# BGDMdocker: an workflow base on Docker for analysis and visualization

## pan-genome and biosynthetic gene clusters of Bacterial

Gong Cheng<sup>1,2</sup>, Zongshan Zhou<sup>1\*</sup>, Ling Ma<sup>3</sup>, Guocai Zhang<sup>3</sup>, Yilei WU<sup>4</sup>, Chao Chen<sup>5</sup>

<sup>1</sup>Research Institute of Pomology, Chinese Academy of Agricultural Sciences, Xingcheng 125100, Liaoning, China, <sup>2</sup>Forest Protection Research Institute of Heilongjiang Province, Harbin, China, <sup>3</sup>Northeast Forestry University, Harbin 150040, <sup>4</sup>Beijing Hygenomics CO., LTD, Beijing, China, <sup>5</sup>TangTangTianxia Biomedical Information Technology CO., LTD, BeiJing, China

### ABSTRACT

**Motivation:** At present Docker technology is increasing level of attention throughout the bioinformatics community, but Docker technology implementation details have not been mastered by most biologist and applied in biological research. In order to apply this technology in the popularization and sufficient use plenty of free academic resources of bioinformatics tools images (community, official, and private) in Docker Hub Registry and other Docker sources base on Docker, In this article, we introduced full and accurate instance of an bioinformatics workflow base on Docker of analysis and visualization pan-genome and biosynthetic geneclusters of Bacterial, provides the solutions for the data mining bioinformatics big data from various free biology databases of Bacterial. we'll guide you step-by-step through the process from dockerfile building your own image and run an container fast creating an workflow.

**Results:** We present BGDMdocker (bacterial genome data ming docker-based) workflow based on docker of pan-genome and biosynthetic geneclusters analysis and visualization can be fully reusable immediately in different computing platforms (Linux, Windows, Mac and deployed in the cloud), achieved cross platform deployment flexibility, rapid development integrated software package. The workflow consists of three integrated toolkit Prokka v1.11, panX, antiSMASH3.0 and its dependencies are all write in Dockerfile, and we use Dockerfile build docker image and run container for anlysis pan-genome of total 44 *B.amyloliquefaciens* strains, that is an open pan-genome, total 172,432 gene, 2,306 Core gene cluster, and visualized pan-genomic data such as alignment, a phylogenetic tree, maps mutations within that cluster to the branches of the tree, infers loss and gain of genes on the core-genome phylogeny for each gene cluster, besides, mining 997 known (MIBiG database) and 553 unknown (antiSMASH-predicted clusters and Pfam database) total 1550 biosynthesis geneclusters types and orthologous groups in all strains. This workflow can also be used for other species pan-genome vis analysis and ualization, you can completely duplicate the display of visual data as well as in this paper. all data of result have been upload in our [website](#), no need to register you can download all tools, data and files.

**Availability and implementation:** BGDMdocker is available at <http://42.96.173.25/bapgd/> and the source code under GPL license is available at [https://github.com/cgwyx/debian\\_prokka\\_panx\\_antismash\\_docker](https://github.com/cgwyx/debian_prokka_panx_antismash_docker)

**Contact:** chenggongwyx@foxmail.com

**Supplementary information:** Supplementary data are available at biorxiv online.

**Keywords:** Docker, pan-genome, biosynthesis geneclusters, Bacterial, *Bacillus amylo-liquefaciens*,

## 1 INTRODUCTION

Bioinformatics academic free software difficulty installing, configuration, and large dependencies and several online server programs limit size of the data upload and so on. therefore a lot of excellent software not make full use of biological problems by biologists. Sharing bioinformatics tools with Docker can reproducibility, convenience build all kind of bioinformatics workflow. It gives programmers, development teams and biologist of bioinformatics the common toolbox they need to take advantage of the use, and building, shipping and running any app, anywhere your distributed applications.

Thus, Dockers technology is very suitable for the application in the field of bioinformatics, because of its advantages and characteristics that allows applications to run in an isolated, self-contained package that can be efficiently distributed and executed in a portable manner across a wide range of computing platforms, etc. (Peter Belmann, 2015; Abdelrahman Hosny, 2016; Aranguren ME, 2015). At present, there are a lot of bioinformatics tools based on docker are developed and published, such as perl and bioperl (Peter Martini, 2016), python and biopython (Moghedrin et al., 2016), R and Bioconductor (Eddelbuettel et al., 2016), contribute their Official Docker image; famous Galaxy also contribute docker galaxy (Björn A. Gruning, 2016). docker will become very extensive in the field of bioinformatics. we use docker technology that rapid construction of pan-genome analysis process, this process can be set up in the Linux, windows and MAC system, can also be deployed in the cloud such as Amazon EC2 or other cloud providers. greatly facilitate biologists apply to biological field. Docker containers have only a minor impact on the performance of common genomic pipelines (Di Tommaso et al. 2015)

*B. amyloliquefaciens* has been researched and explored more and more widely with the abilities to inhibit fungi and bacteria, there by it has high research values and potential for development, which was widely used in biological control (Nam H-S, 2016). Based on the Docker we quickly run an container (ubuntu 16.04 and win10 platform) of analysis workflow and reveal the pan-genome and biosynthetic geneclusters basic features of 44 strains *B. amyloliquefaciens*, achieve result visualizations. The analytical workflow consists of three toolkit: genome annotation Prokka v1.11 (Seemann, 2014), panX (Wei Ding et al. 2016) analysis and visualization of pan genome and antiSMASH3.0 (Weber T et al. 2015) biosynthesis geneclusters, which we write script file and with all of the application and its dependencies in Dockerfile of BGDMdocker (we also write standalone Dockerfile of Prokka, panX, antiMASH in order to meet different application requirements of user), here we detailed how to build workflow and manipulate of the analysis.

## 2 METHODS AND Implementation details

### 2.1 Install docker

Docker containers can be run anywhere: Linux kernels, Windows and Mac (64-bit), can also be deployed in the cloud such as Amazon EC2 or other cloud providers. in this

instance we installation docker-engine on Ubuntu Xenial 16.04 (LTS) and win10 Enterprise operating system. Docker requires a 64-bit installation regardless of your Ubuntu version. Additionally, your kernel must be 3.10 at minimum. more operating systems installation see [here](#),

Installation latest docker(docker-engine 1.12.5-0~ubuntu-xenial) on Ubuntu Xenial 16.04 (LTS) (**Install Docker on Ubuntu,2016**):

Copy the following commands is meant for quick & easy install via latest docker-engine (ubuntu, debian, raspbian, fedora, centos, redhat, suse and oraclelinux *et al.* all applicable):

```
$ curl -sSL https://get.docker.com/ | bash -x
```

or:

```
$ wget -qO- https://get.docker.com/ | bash -x
```

Type the following commands at your shell prompt, If output for docker version it means your installation is successful:

```
$ docker version
```

Installation latest docker on Windows 10 Enterprise(**Install Docker on Windows,2016**):

The current version of Docker for Windows runs on 64bit Windows 10 Pro, Enterprise and Education.

Step 1. Download Docker Install Docker.msi

(<https://download.docker.com/win/stable/InstallDocker.msi>)

Step 2. Install Docker(1.12.0-rc2) for Windows

Double-click InstallDocker.msi to run the installer. Follow the install wizard to accept the license, authorize the installer, and proceed with the install.

Type the following commands at your shell prompt(cmd.exe or PowerShell), will output for docker version it means your installation is successful.

```
$ docker version
```

## **2.2 build images of workflow and run container login interaction patterns**

Dockerfile of BGDMdocker workflow have submit github (<https://github.com>). on your host type the following commands line will login an BGDMdocker container:

```
$ git clone https://github.com/cgwyx/debian_prokka_panx_antismash_docker.git
```

or

```
$ unzip BGDMdocker.zip (Download BGDMdocker.zip)
```

```
$ cd ./debian_prokka_panx_antismash_docker/prokka_panx_antismash_dockerfile
```

Build images of workflow:

```
$ sudo docker build -t BGDMdocker:latest .
```

Run an container from image of BGDMdocker:atest:

```
$ sudo docker run -it --rm -v home:home --name=BGDMdocker BGDMdocker:latest
```

“-v home:home” parameter, Docker will mount the local folder /home into the Container under /home, Store all your data in one directory of home of host operating system, then you may access theese directory of home inside of container .

Check out local images and container:

```
$ sudo docker images
```

```
$ sudo docker ps -a
```

### 2.2.1 Run Prokka annotation genome in container in interaction patterns (if you have own sequene of genome need this step generates .gbff annotation files):

Check out help documentation and command parameters:

```
$ prokka --help
```

Copy the following commands run the analysis instances of annotation genome of Ba\_xx strains in command-line interface of container (boldface please enter your data):

```
$ prokka --kingdom Bacteria --gcode 11 --genus Bacillus \
--species Amyloliuefaciens \
--strain Ba_xx --locustag Ba_xx --prefix Ba_xx --rfam \
--rawproduct --outdir /home/manager/PRJNA291327 \
/home/manager/Ba_xx.fasta
```

“Ba\_xx.fasta” is sequene of genome, “PRJNA291327” is output folder of result.

### 2.2.2 Run panX anlanysi pan-genome in container in interaction patterns:

panX starts with a set of annotated sequences files .gbff(.gbk)(e.g. NCBI RefSeq or GenBank) of a bacterial species genomes, If using own GenBank files(or you have download these files), step02 can be skipped. detail parameters see [here](#).

Check out help documentation and command parameters:

```
$ sh run.sh
```

Copy the following commands run the analysis instances of pan-genome of 44 *B.amyloliuefaciens* strains in command-line interface of container (boldface please enter your data):

```
$ cd /pan-genome-analysis
$ python ./scripts/run-pipeline.py -fn ./data/B_amy -sl B_amy-RefSeq.txt \
-st 1 3 4 5 6 7 8 9 10 11
```

\*.gbff(GenBank files) and B\_amy-RefSeq.txt(accession list for strains) should reside in “./data/B\_amy” folder,result will also output “./data/B\_amy” folder.

### 2.2.3 Run antiSAMSH search geneclusters of every strain in container in interaction patterns:

Check out help documentation and command parameters:

```
$ run_antismash.py --help
```

Copy the following commands run the analysis instances of Biosynthesis geneclusters of Y2(Y2.gbff) strains in command-line interface of container (boldface please enter your data):

```
$ cd /antismash-3.0.5/antismash/
$ run_antismash.py /home/manager/input/Y2.gbff \
--outputfolder /home/manager/output/Y2_out \
--dbgclusterblast ./generic_modules/clusterblast \
--pfamdir ./generic_modules/fullhmmer --input-type nucl --knownclusterblast \
--clusterblast --subclusterblast --inclusive --full-hmmer --smcogs --verbose --asf \
--borderpredict
```

\*.gbff (GenBank files) reside in “input”folder, “Y2\_out” is output folder of result.

## 3 Conclusion

### 3.1 Fast and repeatable build BGDMdocker workflow based on Docker across computing platform

Based on docker technology, using Dockerfile script file, build images and run an Containers in seconds or milliseconds on Linux and Windows(also can be deployed in Mac,cloud such as Amazon EC2 or other cloud providers), Dockerfile is just a small plain text file that can be easily stored and shared. The user does not have to deal with installing and configuring.

In this instance, all image based on Debian 8.0(Jessie),Establishment of a novel Docker-based bioinformatics platform for the study of microbes genomes.The use of workflow containers with standardised interfaces has the potential make the work of biologists easier by creating simple to use, inter-changeable tools to excavate the biological meaning contained in data from biological experiments and Studied on the biological sequence data obtained from biological database through internet. Depending on the sequence obtained, we focused on the information mining in the sequence. We have upload this dockerfile to GitHub for the use of relevant scientific researchers.

### 3.2 result of pan genomes of *B.amyloliquefaciens*

BGDMdocker workflow analyze pan genomes of *B.amyloliquefaciens*. Inorder to exploration High Dimensional Data We built [Website](#) for interactive exploration of the pan-genome and biosynthetic geneclusters. The visualization allows rapid filtering of and searching for genes. For each gene cluster, panX displays an alignment, a phylogenetic tree, maps mutations within that cluster to the branches of the tree, and infers loss and gain of genes on the core-genome phylogeny,in this paper we only lists Summary statistics of result of pan genomes(Table 1),Phylogenetic tree of 44 *B.amyloliquefaciens* strains (Figure 1), no need to register all detail data can be visualization and download.

**Table 1.** summary statistics of pan-genome of 44 *B.amyloliquefaciens* strains

| Accession       | Strains   | Gene of strains in pan-genome of <i>B.amyloliquefaciens</i> (172,432 Total gene ;2306 Core gene cluster) |           |          |          | Gene of strains genome |             |
|-----------------|-----------|----------------------------------------------------------------------------------------------------------|-----------|----------|----------|------------------------|-------------|
|                 |           | Total gene                                                                                               | Core gene | Acc gene | Uni gene | All gene               | All protein |
| CYHL01000001    | JRS5      | 3856                                                                                                     | 2310      | 1546     | 57       | 3870                   | 3863        |
| CYHP01000001    | JRS8      | 3994                                                                                                     | 2311      | 1683     | 118      | 4016                   | 4006        |
| NC_014551       | DSM7      | 3935                                                                                                     | 2307      | 1628     | 21       | 4030                   | 3811        |
| NC_017188       | TA208     | 3935                                                                                                     | 2307      | 1628     | 1        | 3974                   | 3847        |
| NC_017190       | LL3       | 3981                                                                                                     | 2308      | 1673     | 19       | 4037                   | 3887        |
| NC_017191       | XH7       | 3942                                                                                                     | 2307      | 1635     | 6        | 3983                   | 3846        |
| NC_017912       | Y2        | 4099                                                                                                     | 2310      | 1789     | 46       | 4148                   | 3983        |
| NC_020272       | IT-45     | 3803                                                                                                     | 2310      | 1493     | 4        | 3832                   | 3678        |
| NC_022653       | CC178     | 3754                                                                                                     | 2310      | 1444     | 19       | 3795                   | 3641        |
| NC_023073       | LFB112    | 3761                                                                                                     | 2308      | 1453     | 19       | 3801                   | 3637        |
| NZ_AUNG01000001 | Lx-11     | 3700                                                                                                     | 2309      | 1391     | 5        | 3742                   | 3619        |
| NZ_AUWK01000001 | HB-26     | 3797                                                                                                     | 2311      | 1486     | 30       | 3842                   | 3714        |
| NZ_AVQH01000001 | EGD-AQ141 | 4079                                                                                                     | 2311      | 1768     | 54       | 4121                   | 3995        |
| NZ_AWQY01000001 | UASWS BA1 | 3794                                                                                                     | 2309      | 1485     | 8        | 3806                   | 3681        |
| NZ_CP006058     | UMAF6639  | 3825                                                                                                     | 2311      | 1514     | 20       | 3879                   | 3716        |
| NZ_CP006960     | UMAF6614  | 3804                                                                                                     | 2311      | 1493     | 13       | 3850                   | 3695        |
| NZ_CP007242     | KHG19     | 3775                                                                                                     | 2310      | 1465     | 19       | 3816                   | 3658        |
| NZ_CP010556     | L-H15     | 3724                                                                                                     | 2309      | 1415     | 6        | 3769                   | 3615        |
| NZ_CP011278     | L-S60     | 3728                                                                                                     | 2310      | 1418     | 7        | 3773                   | 3611        |
| NZ_CP013727     | MBE1283   | 3794                                                                                                     | 2314      | 1480     | 24       | 3856                   | 3681        |
| NZ_CP014700     | S499      | 3776                                                                                                     | 2310      | 1466     | 5        | 3819                   | 3671        |
| NZ_CP014783     | B15       | 3820                                                                                                     | 2315      | 1505     | 13       | 3875                   | 3704        |
| NZ_CP016913     | RD7-7     | 3597                                                                                                     | 2308      | 1289     | 39       | 3656                   | 3483        |
| NZ_DF836091     | DNA       | 3771                                                                                                     | 2311      | 1460     | 128      | 3901                   | 3706        |
| NZ_JCOC01000001 | EBL11     | 3733                                                                                                     | 2308      | 1425     | 20       | 3773                   | 3682        |
| NZ_JMEG01000001 | B1895     | 3824                                                                                                     | 2306      | 1518     | 167      | 4026                   | 3623        |
| NZ_JQNZ01000001 | X1        | 3724                                                                                                     | 2309      | 1415     | 3        | 3766                   | 3619        |
| NZ_JTJG01000001 | JJC33M    | 3888                                                                                                     | 2309      | 1579     | 121      | 3952                   | 3796        |
| NZ_JXAT01000001 | LPL-K103  | 3709                                                                                                     | 2309      | 1400     | 15       | 3743                   | 3637        |
| NZ_JZDI01000001 | 12B       | 8166                                                                                                     | 2354      | 5812     | 4040     | 8194                   | 7985        |
| NZ_KB206086     | DC-12     | 3910                                                                                                     | 2311      | 1599     | 50       | 3984                   | 3842        |
| NZ_KN723307     | TF281     | 3640                                                                                                     | 2312      | 1328     | 5        | 3782                   | 3571        |

|                 |            |      |      |      |     |      |      |
|-----------------|------------|------|------|------|-----|------|------|
| NZ_LGYP01000001 | 629        | 3536 | 2313 | 1223 | 11  | 3785 | 3427 |
| NZ_LJAU01000001 | Bs006      | 4042 | 2312 | 1730 | 46  | 4074 | 3969 |
| NZ_LJDI01000020 | XK-4-1     | 3799 | 2310 | 1489 | 14  | 3821 | 3701 |
| NZ_LMAG01000001 | RHNC22     | 3781 | 2309 | 1472 | 37  | 3837 | 3698 |
| NZ_LMAT01000001 | Jxnuwx-1   | 3930 | 2309 | 1621 | 246 | 4008 | 3870 |
| NZ_LMUC01000016 | H57        | 3816 | 2310 | 1506 | 42  | 3859 | 3732 |
| NZ_LPUP01000011 | 11B91      | 3790 | 2311 | 1479 | 49  | 3892 | 3702 |
| NZ_LQQW01000001 | M49        | 3694 | 2311 | 1383 | 21  | 3741 | 3617 |
| NZ_LQYO01000001 | B4140      | 3771 | 2307 | 1464 | 49  | 3847 | 3713 |
| NZ_LQYP01000001 | B425       | 3921 | 2310 | 1611 | 39  | 4034 | 3844 |
| NZ_LYUG01000001 | SRCM101266 | 3724 | 2306 | 1418 | 15  | 3781 | 3628 |
| NZ_LZZO01000001 | SRCM101294 | 3946 | 2308 | 1638 | 175 | 3982 | 3850 |

Genome sequences of [44 \*B.amyloliquefaciens\* strains](#) (download genbank RefSeq dadabase) used in this study, strains name, accession numbers, and gene numbers of pan-genome and genome summary statistics.

“Acc gene” is accessory gene(dispensable gene), “Uni gene” is unique gene(strain-specific gene) “All genes” is genes of \*.gbff files recoder,includ Pseudo Genes, “Total genes” is involved in the pan genome analysis, not Pseudo Genes.

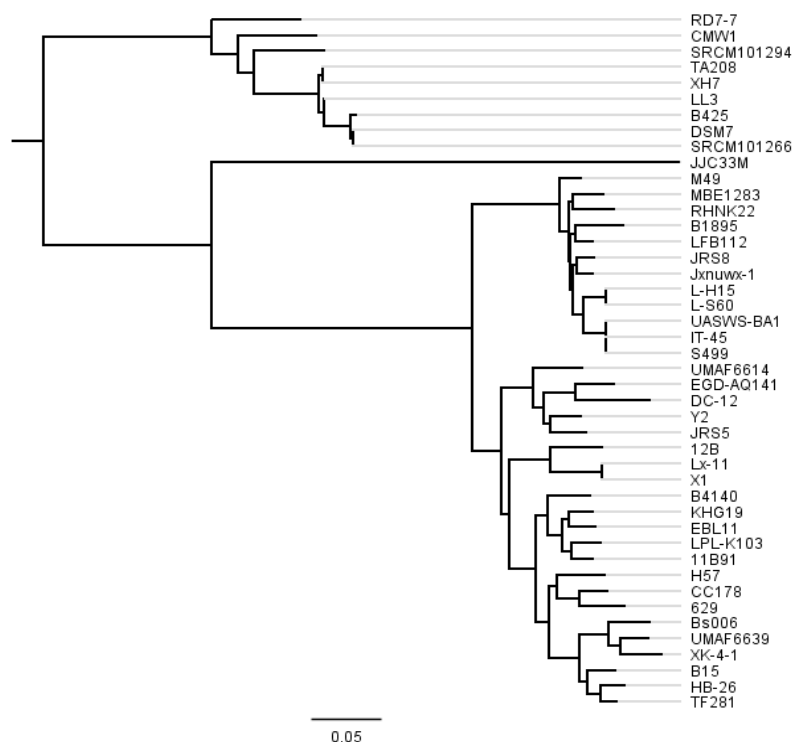

Fig.1. Phylogenetic tree of 44 *B.amyloliquefaciens* strains. The tree was constructed using all of the genes shared between all 44 strains (2306 core genes).

### 3.3 result of Analysis of biosynthetic geneclusters result

BGDMdocker workflow identification and analysis results of biosynthetic gene clusters of genomes of 44 strain *B. amyloliquefaciens* have been upload in our [web-site](#),no need to register and vis and download all detail data.

In this paper we only give a brief summary statistics of biosynthetic geneclusters of all 44 strains(Table 2),and shows an instance of biosynthetic geneclusters type and number result of Y2 strain,there are total 31 geneclusters in Genome of Y2 strain, 21 geneclusters show similarity known cluster MIBiG,like this Surfactin,Mersacidin, Fengycin,and so on ,others 10 geneclusters is unknown(Table 3).



**Table 2.** summary statistics of biosynthetic geneclusters of 44 *B.amyloliquefaciens* strains

| Accession       | Strains    | Biosynthesis geneclusters |       |         |      | Genome of strains |      |         | Host      |
|-----------------|------------|---------------------------|-------|---------|------|-------------------|------|---------|-----------|
|                 |            | Total                     | known | Unknown | Type | Size(Mb)          | Gene | Protein |           |
| CYHL01000001    | JRS5       | 38                        | 27    | 11      | 12   | 4.03148           | 3870 | 3863    | -         |
| CYHP01000001    | JRS8       | 42                        | 26    | 16      | 11   | 4.0909            | 4016 | 4006    | -         |
| NC_014551       | DSM7       | 31                        | 18    | 13      | 9    | 3.9802            | 4030 | 3811    | -         |
| NC_017188       | TA208      | 29                        | 17    | 12      | 10   | 3.93751           | 3974 | 3847    | -         |
| NC_017190       | LL3        | 29                        | 17    | 12      | 9    | 4.00199           | 4037 | 3887    | -         |
| NC_017191       | XH7        | 29                        | 17    | 12      | 10   | 3.9392            | 3983 | 3846    | -         |
| NC_017912       | Y2         | 31                        | 21    | 10      | 11   | 4.23862           | 4148 | 3983    | -         |
| NC_020272       | IT-45      | 32                        | 19    | 13      | 11   | 3.93687           | 3832 | 3678    | -         |
| NC_022653       | CC178      | 35                        | 19    | 16      | 9    | 3.91683           | 3795 | 3641    | -         |
| NC_023073       | LFB112     | 35                        | 20    | 15      | 10   | 3.94275           | 3801 | 3637    | -         |
| NZ_AUNG01000001 | Lx-11      | 37                        | 25    | 12      | 11   | 3.88689           | 3742 | 3619    | -         |
| NZ_AUWK01000001 | HB-26      | 45                        | 30    | 15      | 9    | 3.98936           | 3842 | 3714    | -         |
| NZ_AVQH01000001 | EGD-AQ141  | 36                        | 26    | 10      | 12   | 4.22259           | 4121 | 3995    | -         |
| NZ_AWQY01000001 | UASWS BA1  | 37                        | 25    | 12      | 11   | 3.94409           | 3806 | 3681    | -         |
| NZ_CP006058     | UMAF6639   | 35                        | 21    | 14      | 10   | 4.03464           | 3879 | 3716    | -         |
| NZ_CP006960     | UMAF6614   | 32                        | 20    | 12      | 10   | 4.00514           | 3850 | 3695    | -         |
| NZ_CP007242     | KHG19      | 32                        | 20    | 12      | 10   | 3.95336           | 3816 | 3658    | -         |
| NZ_CP010556     | L-H15      | 32                        | 19    | 13      | 10   | 3.90597           | 3769 | 3615    | -         |
| NZ_CP011278     | L-S60      | 32                        | 19    | 13      | 10   | 3.90302           | 3773 | 3611    | -         |
| NZ_CP013727     | MBE1283    | 35                        | 22    | 13      | 12   | 3.97993           | 3856 | 3681    | -         |
| NZ_CP014700     | S499       | 33                        | 19    | 14      | 11   | 3.93593           | 3819 | 3671    | Plant     |
| NZ_CP014783     | B15        | 29                        | 19    | 10      | 10   | 4.00675           | 3875 | 3704    | Grape     |
| NZ_CP016913     | RD7-7      | 31                        | 17    | 14      | 8    | 3.68821           | 3656 | 3483    | -         |
| NZ_DF836091     | DNA        | 30                        | 20    | 10      | 11   | 3.90857           | 3901 | 3706    | -         |
| NZ_JCOC01000001 | EBL11      | 35                        | 23    | 12      | 11   | 3.92932           | 3773 | 3682    | -         |
| NZ_JMEG01000001 | B1895      | 38                        | 24    | 14      | 12   | 4.10728           | 4026 | 3623    | -         |
| NZ_JQNZ01000001 | X1         | 40                        | 28    | 12      | 10   | 3.9211            | 3766 | 3619    | -         |
| NZ_JTJG01000001 | JJC33M     | 36                        | 25    | 11      | 12   | 3.96166           | 3952 | 3796    | -         |
| NZ_JXAT01000001 | LPL-K103   | 36                        | 23    | 13      | 9    | 3.87327           | 3743 | 3637    | -         |
| NZ_JZDI01000001 | 12B        | 69                        | 49    | 20      | 11   | 7.59676           | 8194 | 7985    | -         |
| NZ_KB206086     | DC-12      | 28                        | 19    | 9       | 11   | 4.01656           | 3984 | 3842    | -         |
| NZ_KN723307     | TF281      | 31                        | 20    | 11      | 11   | 3.98764           | 3782 | 3571    | Glycine   |
| NZ_LGYP01000001 | 629        | 31                        | 18    | 13      | 10   | 3.90337           | 3785 | 3427    | max       |
| NZ_LJAU01000001 | Bs006      | 45                        | 30    | 15      | 10   | 4.17309           | 4074 | 3969    | Theobroma |
| NZ_LJDI01000020 | XK-4-1     | 37                        | 24    | 13      | 12   | 3.94181           | 3821 | 3701    | cacao     |
| NZ_LMAG01000001 | RHNC22     | 38                        | 27    | 11      | 12   | 3.97818           | 3837 | 3698    | -         |
| NZ_LMAT01000001 | Jxnuwx-1   | 40                        | 27    | 13      | 10   | 4.08932           | 4008 | 3870    | Musa acu- |
| NZ_LMUC01000016 | H57        | 34                        | 23    | 11      | 11   | 3.95883           | 3859 | 3732    | minata    |
| NZ_LPUP01000011 | 11B91      | 33                        | 20    | 13      | 10   | 4.02366           | 3892 | 3702    | Cotton    |
| NZ_LQQW01000001 | M49        | 41                        | 30    | 11      | 11   | 3.88665           | 3741 | 3617    | -         |
| NZ_LQYO01000001 | B4140      | 39                        | 25    | 14      | 11   | 4.01425           | 3847 | 3713    | -         |
| NZ_LQYP01000001 | B425       | 29                        | 20    | 9       | 9    | 3.9682            | 4034 | 3844    | -         |
| NZ_LYUG01000001 | SRCM101266 | 31                        | 19    | 12      | 11   | 3.76536           | 3781 | 3628    | -         |
| NZ_LZZO01000001 | SRCM101294 | 32                        | 20    | 12      | 10   | 3.96275           | 3982 | 3850    | -         |

“Total” of Biosynthesis geneclusters is include “Known”and“Unknown”.“Known” of Biosynthesis geneclusters from the [MIBiG](#) ( Minimum Information about a Biosynthetic Gene cluster). “Unknown” of Biosynthesis geneclusters detected by Cluster Finder are further categorized into putative (“Cf\_putative”) biosynthetic types. A full integration of the recently published Cluster Finder algorithm now allows using this probabilistic algorithm to detect putative gene clusters of unknown types, “-” of host is unrecorded.

**Table 3.** biosynthetic geneclusters of Y2 strains

| Cluster   | Type          | Most similar known cluster                                                                | MIBiG BGC-ID  |
|-----------|---------------|-------------------------------------------------------------------------------------------|---------------|
| Cluster 1 | Nrps          | Surfactin_biosynthetic_gene_cluster (43% of genes show similarity)                        | BGC0000433_c1 |
| Cluster 2 | Cf_putative   | -                                                                                         | -             |
| Cluster 3 | Cf_putative   | -                                                                                         | -             |
| Cluster 4 | Cf_fatty_acid | -                                                                                         | -             |
| Cluster 5 | Phosphonate   | Pactamycin_biosynthetic_gene_cluster (3% of genes show similarity)                        | BGC0000119_c1 |
| Cluster 6 | Cf_saccharide | Plantathiazolicin/_plantazolicin_biosynthetic_gene_cluster (33% of genes show similarity) | BGC0000569_c1 |
| Cluster 7 | Cf_putative   | -                                                                                         | -             |
| Cluster 8 | Otherks       | -                                                                                         | -             |

|            |                     |                                                                            |               |
|------------|---------------------|----------------------------------------------------------------------------|---------------|
| Cluster 9  | Cf_fatty_acid       | -                                                                          | -             |
| Cluster 10 | Cf_putative         | -                                                                          | -             |
| Cluster 11 | Terpene             | -                                                                          | -             |
| Cluster 12 | Cf_fatty_acid       | -                                                                          | -             |
| Cluster 13 | Cf_putative         | -                                                                          | -             |
| Cluster 14 | Cf_putative         | -                                                                          | -             |
| Cluster 15 | Transatpks          | Macrolactin_biosynthetic_gene_cluster (90% of genes show similarity)       | BGC0000181_c1 |
| Cluster 16 | Nrps-Transatpks     | Bacillaene_biosynthetic_gene_cluster (85% of genes show similarity)        | BGC0001089_c1 |
| Cluster 17 | Nrps-Transatpks     | Fengycin_biosynthetic_gene_cluster (93% of genes show similarity)          | BGC0001095_c1 |
| Cluster 18 | Terpene             | -                                                                          | -             |
| Cluster 19 | Cf_saccharide-T3pks | -                                                                          | -             |
| Cluster 20 | Transatpks          | Difficidin_biosynthetic_gene_cluster (100% of genes show similarity)       | BGC0000176_c1 |
| Cluster 21 | Cf_putative         | -                                                                          | -             |
| Cluster 22 | Nrps-Bacteriocin    | Bacillibactin_biosynthetic_gene_cluster (100% of genes show similarity)    | BGC0000309_c1 |
| Cluster 23 | Cf_saccharide       | -                                                                          | -             |
| Cluster 24 | Nrps                | -                                                                          | -             |
| Cluster 25 | Cf_saccharide       | Teichuronic_acid_biosynthetic_gene_cluster (100% of genes show similarity) | BGC0000868_c1 |
| Cluster 26 | Cf_putative         | -                                                                          | -             |
| Cluster 27 | Cf_saccharide       | Bacilysin_biosynthetic_gene_cluster (100% of genes show similarity)        | BGC0001184_c1 |
| Cluster 28 | Cf_putative         | -                                                                          | -             |
| Cluster 29 | Lantipeptide        | Mersacidin_biosynthetic_gene_cluster (90% of genes show similarity)        | BGC0000527_c1 |
| Cluster 30 | Cf_saccharide       | -                                                                          | -             |
| Cluster 31 | Cf_putative         | -                                                                          | -             |

“Cf putative” is putative biosynthetic types (unknown types) detected by Cluster Finder are further categorized, known types from the MIBiG ( Minimum Information about a Biosynthetic Gene cluster , <http://mibig.secondarymetabolites.org>).

## 4 DISCUSSION

### Docker advantages and limitations:

Docker advantages as follow:

1.Dockerfile convenient for deployed and shared; make it is easy for other users to customize the image by editing the Dockerfile directly.It very unlikely Makefile and other installation that the resulting build will differ when being built on different machines(Boettiger C. 2014).Through Dockerfile, can maintain and update related adjustment, further more rapid rollback in the event of failure of System, according to the demand to control version and build the best application environment.

2.Portability, Modular reuse; Most bioinformatics tools is written in different languages, require different operating environment configuration and cross platform, Docker provide the same functions and services in different environments without additional configuration(Folarin, A. et al. 2015), so it is possible that the results of repetition and reuse tools. By constructing pipelines with different tools, bioinformatics can automatically and effectively analyze scientific problem they are concern at of biological.

3.Application solation,efficiency,exible:Docker can be run independently containers of every applications,and Management operations (start, stop,boot, etc.) of Containers in seconds or milliseconds;we may run more than hundreds of containers on a single host (Ali, A. A. et al. 2016). This ensure that the failure of one task does not cause disruption of the entire process, and quickly start a new container to continue to perform this task until the completion of the whole process, improve the overall efficiency.

Docker limitations as follow:



1. Docker is limited to 64-bit host machines, then making it can not to run on 32-bit older hardware.
2. On Mac and Windows OS, Docker must run boot2docker tool in a fully virtualized environment.

## References

- Peter Belmann *et al.* (2015) Bioboxes: standardised containers for interchangeable bioinformatics software. *Giga Science*, 4, 47 DOI 10.1186/s13742-015-0087-0
- Abdelrahman Hosny *et al.* (2016) AlgoRun: a Docker-based packaging system for platform-agnostic implemented algorithms. *Bioinformatics*, 32, 2396-2398.
- Aranguren ME, Wilkinson MD. (2015) Enhanced reproducibility of SADI web service workflows with Galaxy and Docker. *GigaScience*, 4, 59. doi:10.1186/s13742-015-0092-3.
- Peter Martini, 2016. [https://hub.docker.com/\\_/perl/](https://hub.docker.com/_/perl/)
- Moghedrin et al., 2016. [https://hub.docker.com/\\_/python/](https://hub.docker.com/_/python/)
- Eddelbuettel *et al.*, 2016. [https://hub.docker.com/\\_/r-base/](https://hub.docker.com/_/r-base/)
- Björn A. Grüning, 2016. <https://hub.docker.com/r/bgruening/galaxy-stable/>
- Di Tommaso *et al.* (2015). The impact of Docker containers on the performance of genomic pipelines. *PeerJ*, 3, e1273. <http://doi.org/10.7717/peerj.1273>
- Nam H-S *et al.* (2016) Biological Control Potential of *Bacillus amyloliquefaciens* KB3 Isolated from the Feces of *Allomyrina dichotoma* Larvae. *The Plant Pathology Journal*. 32(3):273-280. doi:10.5423/PPJ.NT.12.2015.0274.
- Torsten Seemann. (2014) Prokka: rapid prokaryotic genome annotation. *Bioinformatics* 30 (14): 2068-2069 doi:10.1093/bioinformatics/btu153
- Wei Ding *et al.* (2016) panX: pan-genome analysis and exploration. bioRxiv 072082; doi: <http://dx.doi.org/10.1101/072082>
- Weber T *et al.* (2015) antiSMASH 3.0—a comprehensive resource for the genome mining of biosynthetic gene clusters. *Nucleic Acids Research*, 43(W1):237-43.
- Docker Inc. (2016) Install Docker on Windows. <https://docs.docker.com/docker-for-windows/>
- Docker Inc. (2016) Install Docker on Ubuntu. <https://docs.docker.com/engine/installation/linux/ubuntulinux/>
- Boettiger C. (2014) An introduction to Docker for reproducible research, with examples from the R environment. *ACM SIGOPS Operating Systems Review, Special Issue on Repeatability and Sharing of Experimental Artifacts* 49(1):71–79 DOI 10.1145/2723872.2723882.
- Folarin AA *et al.* (2015) NGSeasy: a next generation sequencing pipeline in Docker containers [version 1; referees: awaiting peer review], *F1000Research* 4(ISC Comm J):997 (doi: 10.12688/f1000research.7104.1)
- Ali, A. A. *et al.* (2016). The Case for Docker in Multicloud Enabled Bioinformatics Applications. *Bioinformatics and Biomedical Engineering*. Springer International Publishing. Volume 9656, 587-601
